# Supplementary material for: EPHA2 Segregates with Microphthalmia and Congenital Cataracts in Two Unrelated Families
Source: MDPI journal article supplement (doi:10.3390/ijms22042190), 2021-02-22
Supplement: s1 [file s1]

Supplementary Materials:

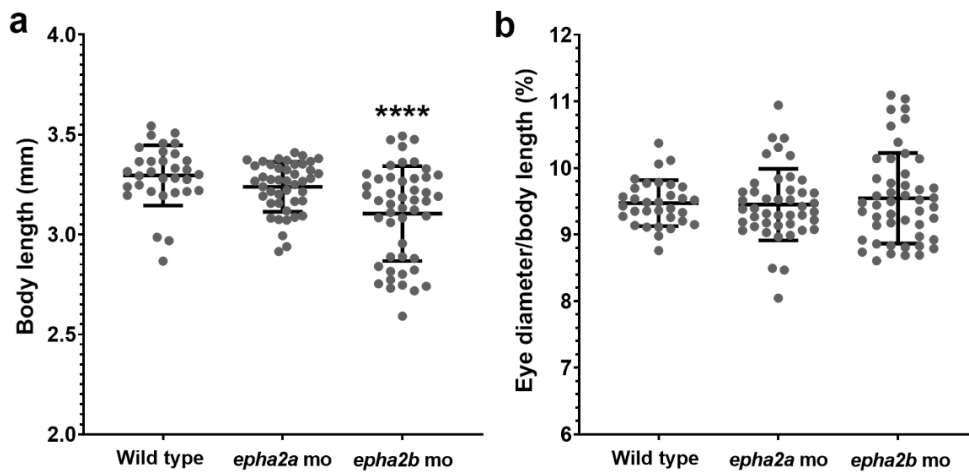

**Figure S1. Body length in *epha2a* and *epha2b* morphant zebrafish.** (a) At 3dpf, body length was found to be significantly reduced in *epha2b* morphant embryos ( $p > 0.0001$ ) compared to un-injected controls siblings. The reduction in body length in *epha2a* morphants was not quite statistically significant ( $p = 0.058$ ). (b) The eye diameter/body length ratio (%) was not found to be significantly different in the morphant groups compared to age-matched wild-type. Unpaired t-tests or Mann-Whitney tests were used to compare the data.

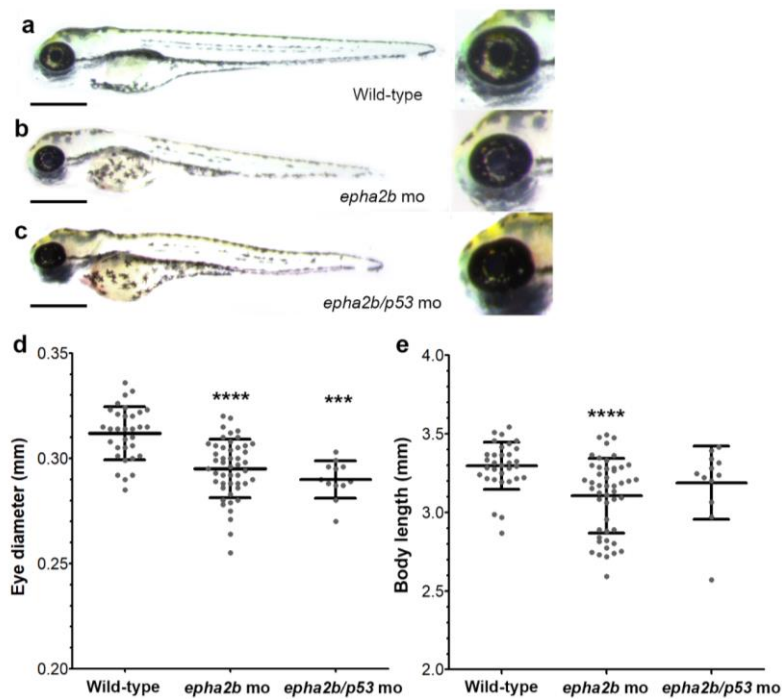

**Figure S2. Knockdown of *epha2b* and *p53* in zebrafish embryos.** (a–c) at 3dpf, simultaneous morpholino knockdown of *epha2b* and *p53* caused a similar microphthalmia phenotype to that observed in embryos with *epha2b* knocked down alone. (d) Eye diameter in *epha2b/p53* morphants was significantly reduced compared to uninjected wild-type and was not significantly different compared to *epha2b* morphants. (e) Body length was not significantly different compared to uninjected wild-type. \*\*\*\*  $p < 0.0001$ , \*\*\*  $p < 0.001$ .
